# Supplementary material for: Diversity dynamics of aerobic anoxygenic phototrophic bacteria in a freshwater lake
Source: PubMed Central journal article supplement (PMC10103773; doi:10.1111/1758-2229.13131), 2022-12-12
Supplement: EMI4-15-60-s001.pdf [file EMI4-15-60-s001.pdf]

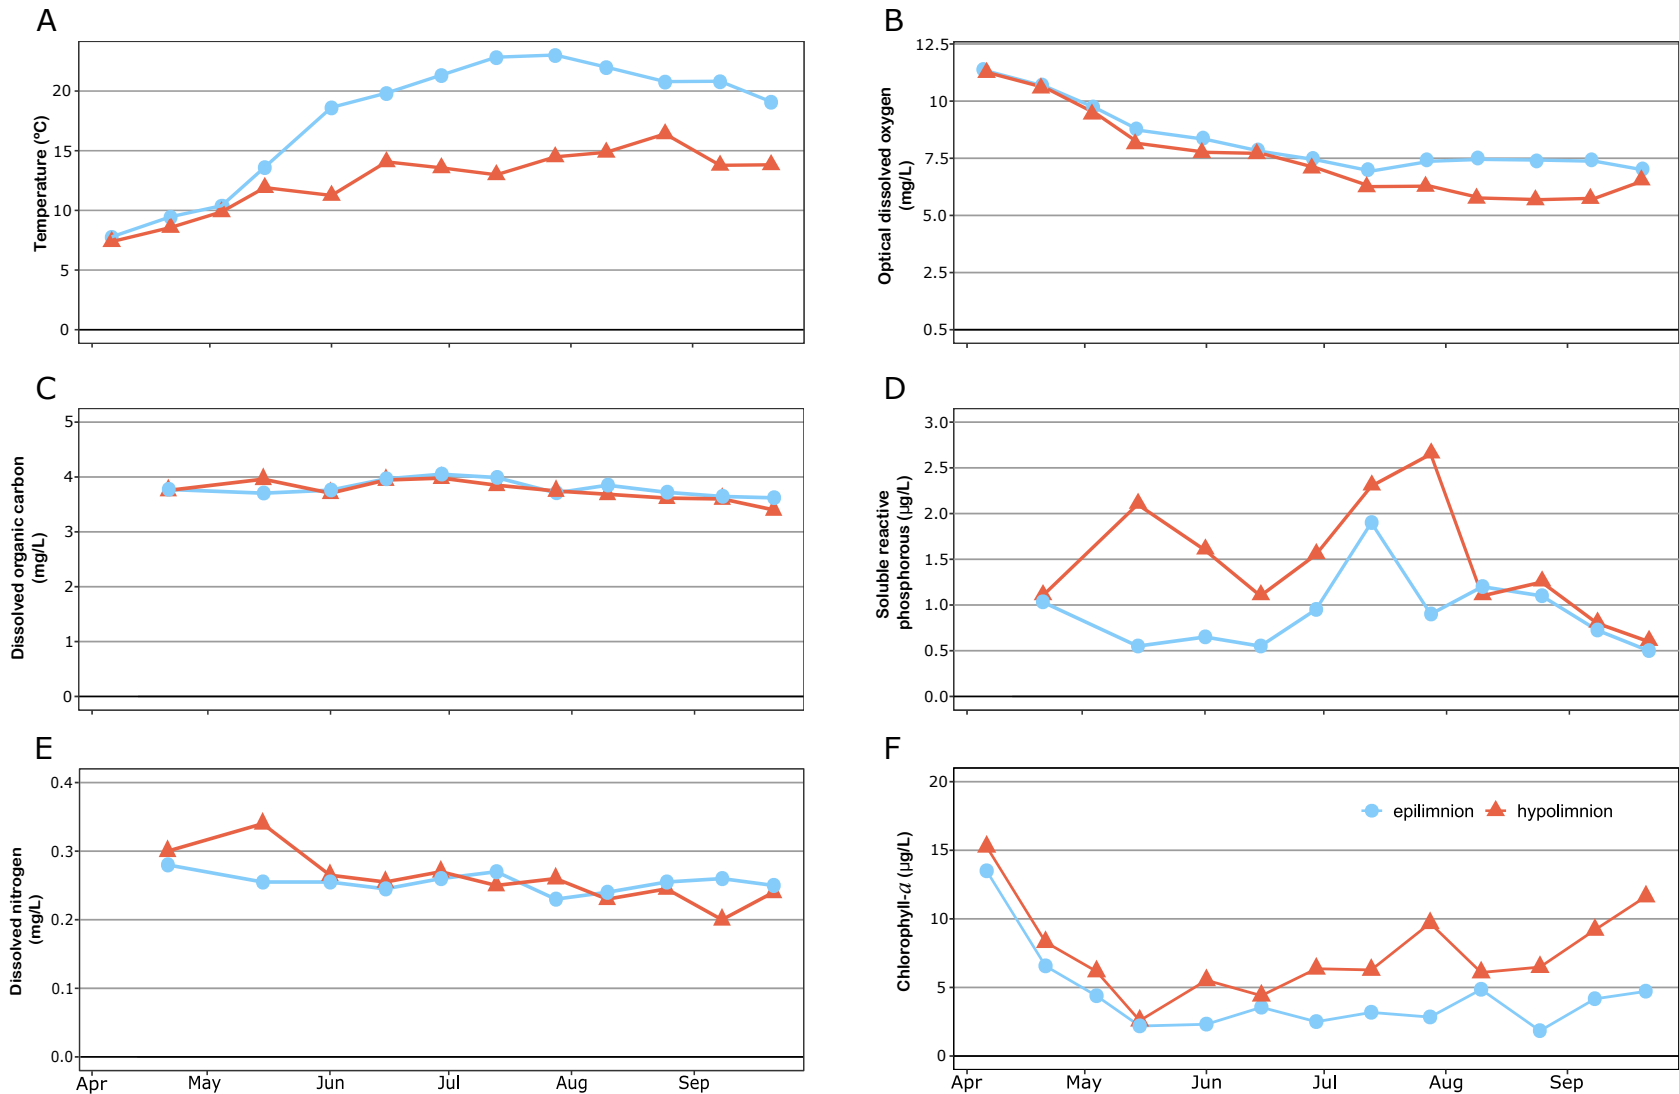

**Supplementary Figure S1.** Weekly values of environmental variables in epilimnion (blue-circles and line) and hypolimnion (red - triangles and line) of Cep lake. (A) temperature; (B) optical dissolved oxygen; (C) dissolved organic carbon; (D) soluble reactive phosphorous; (E) dissolved nitrogen; and (F) chlorophyll-a.

**A**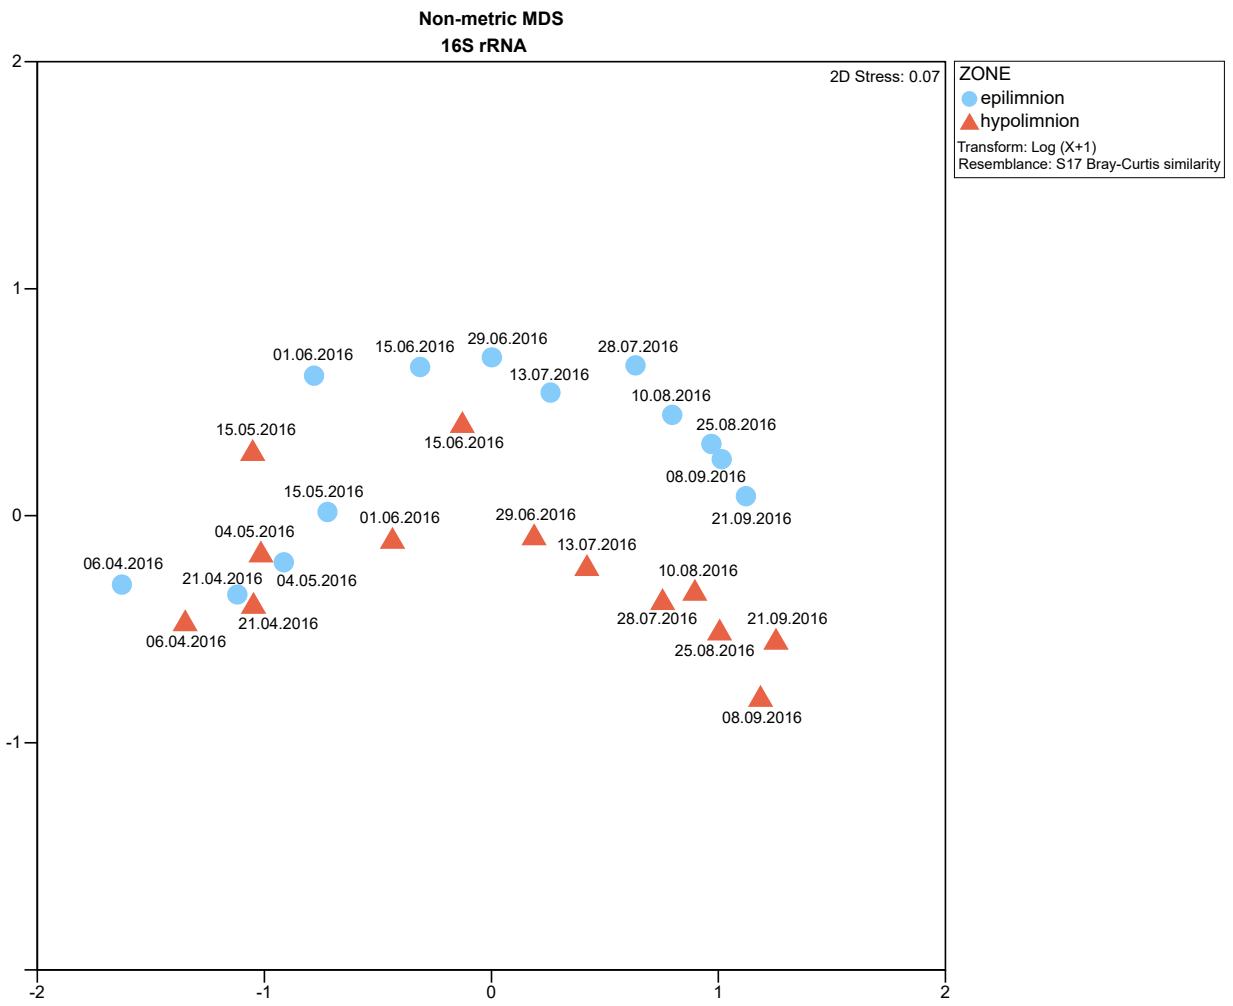**B**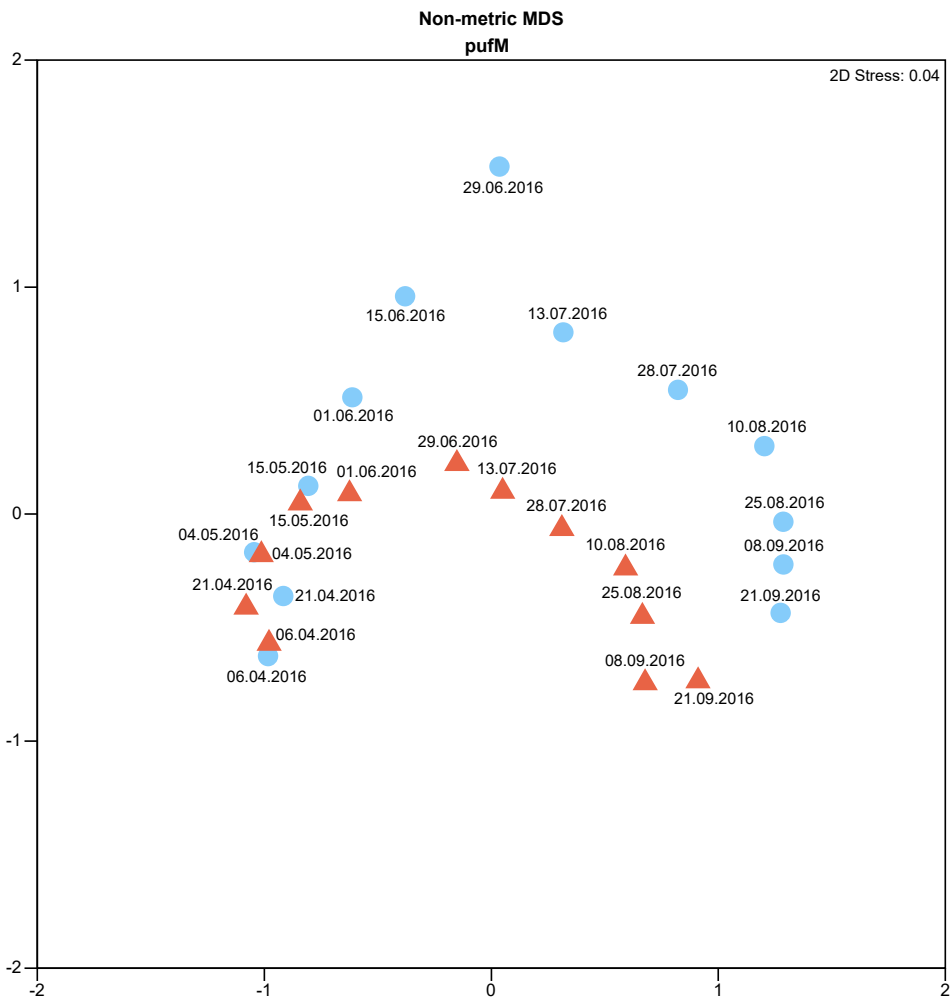

**Supplementary Figure S2.** Nonmetric multidimensional scaling plots of (A) all bacteria and (B) AAP bacteria based on Bray-Curtis distances.

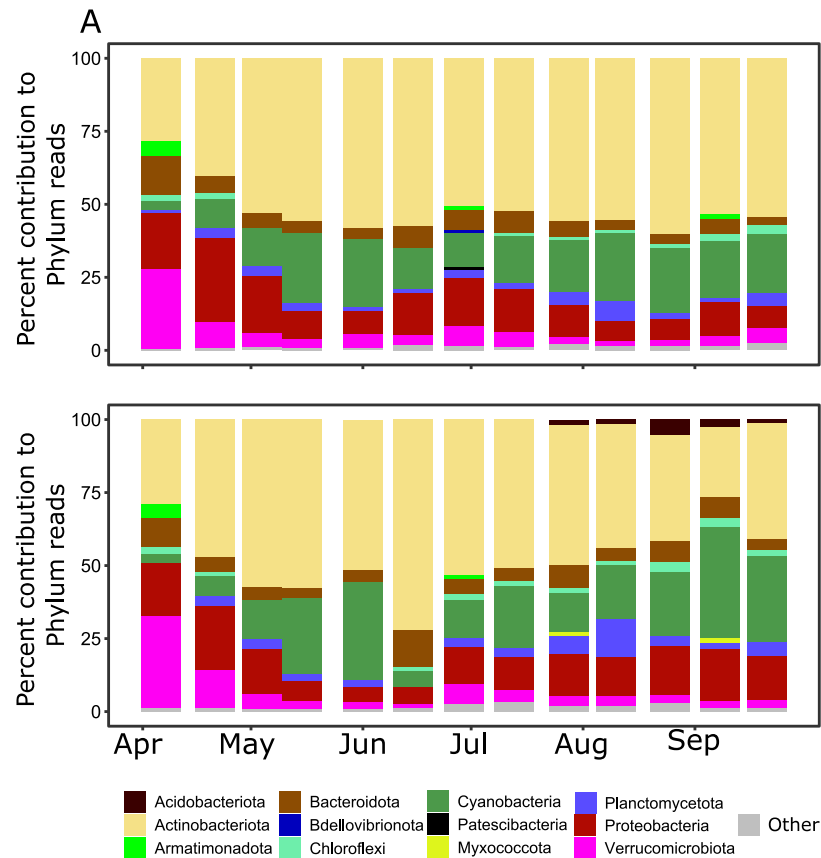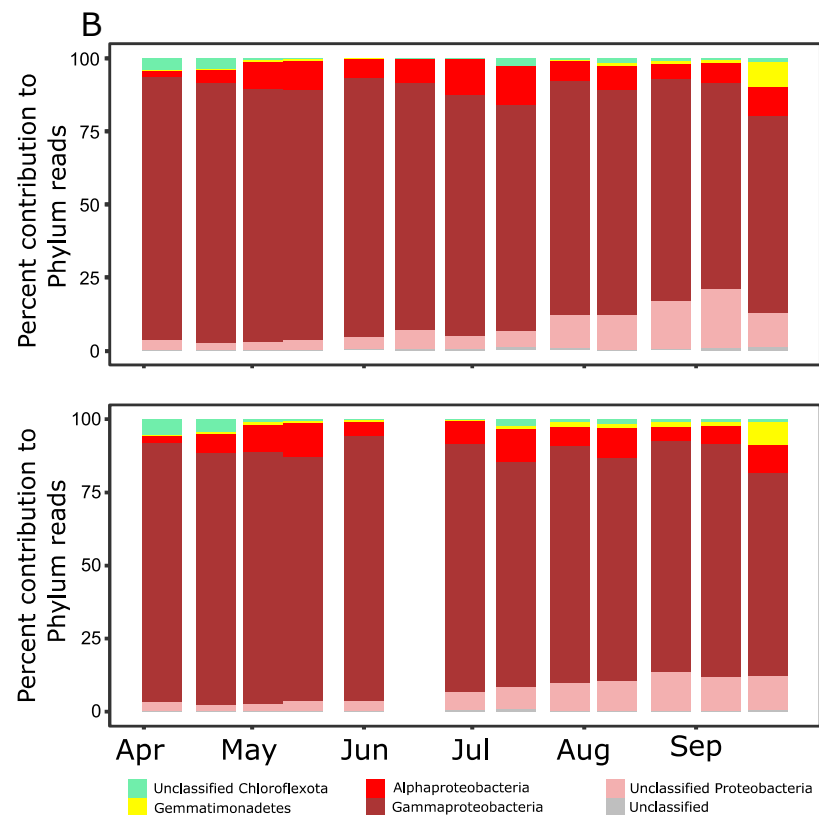

**Supplementary Figure S3.** Community contribution at phylum level of (A) total bacteria community and (B) AAP bacteria community for epilimnion (top) and hypolimnion (bottom).

# Chloroflexota and Eremiobacteriota

## Proteobacteria

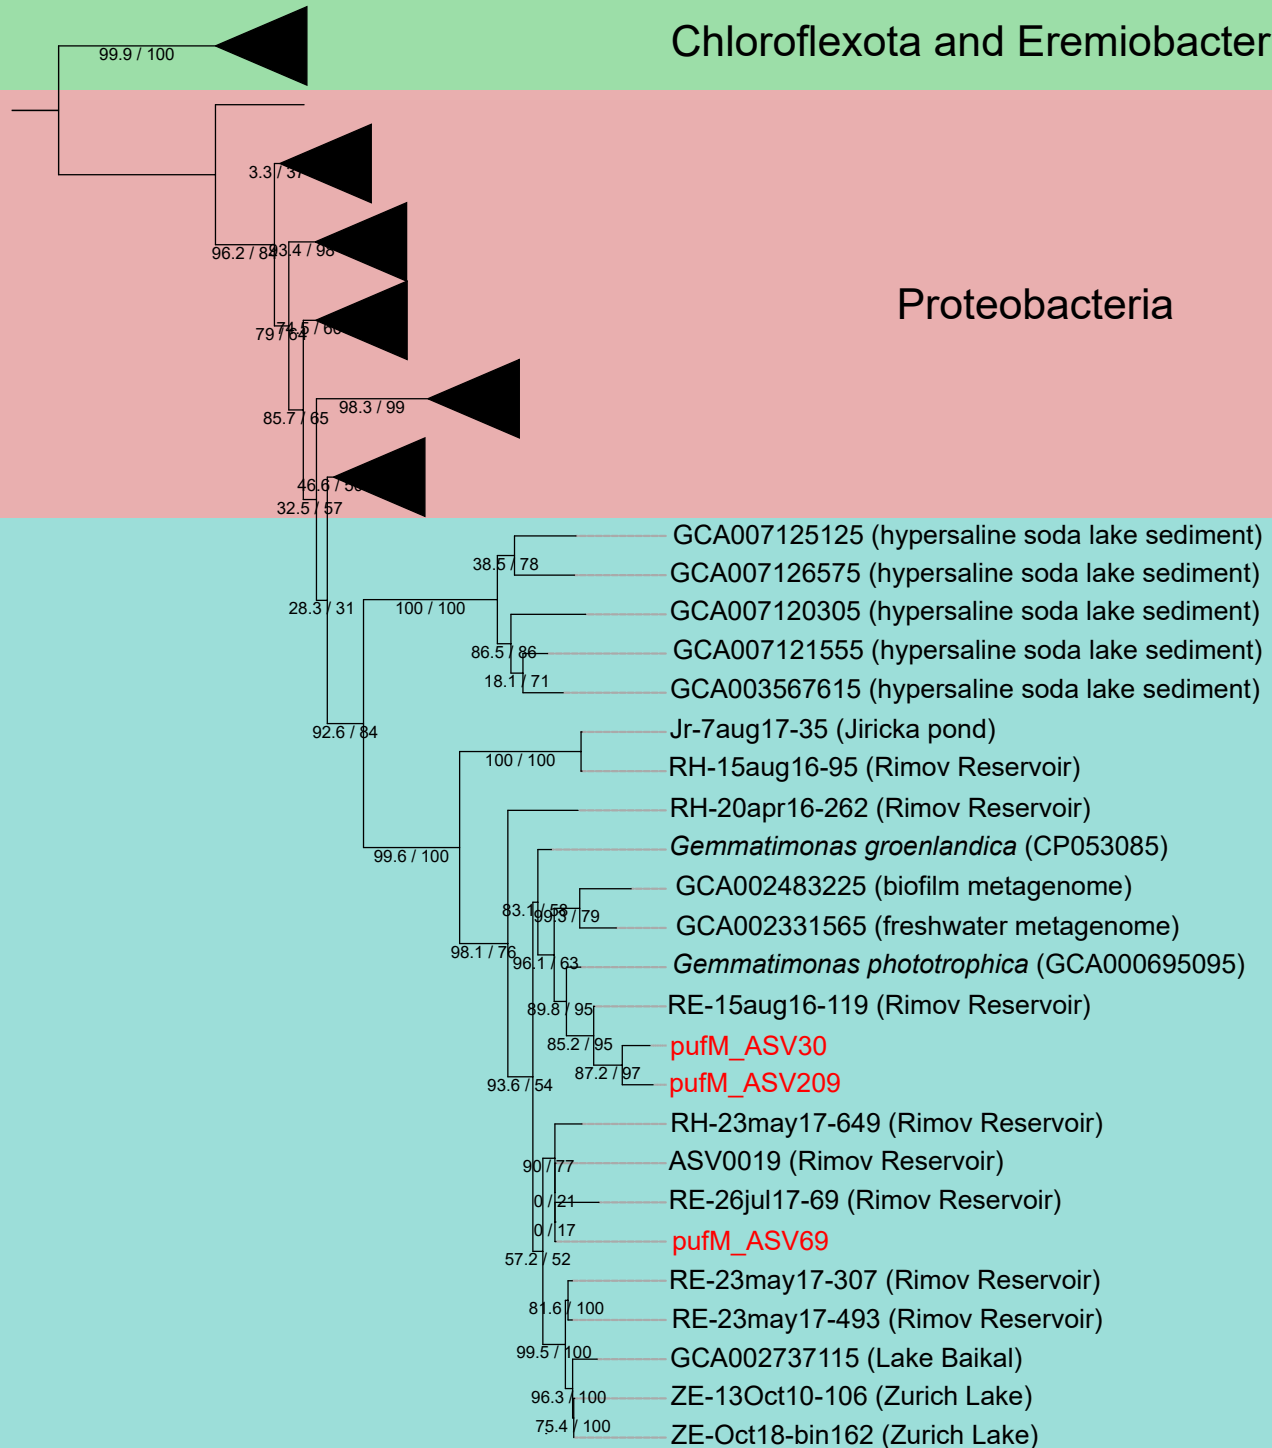

**Supplementary Figure S4.** Phylogenetic tree showing in detail Gemmatimonadota phylum sequences and unclassified ASVs that clustered inside.

Proteobacteria, Gemmatimonadota and Eremiobacteriota

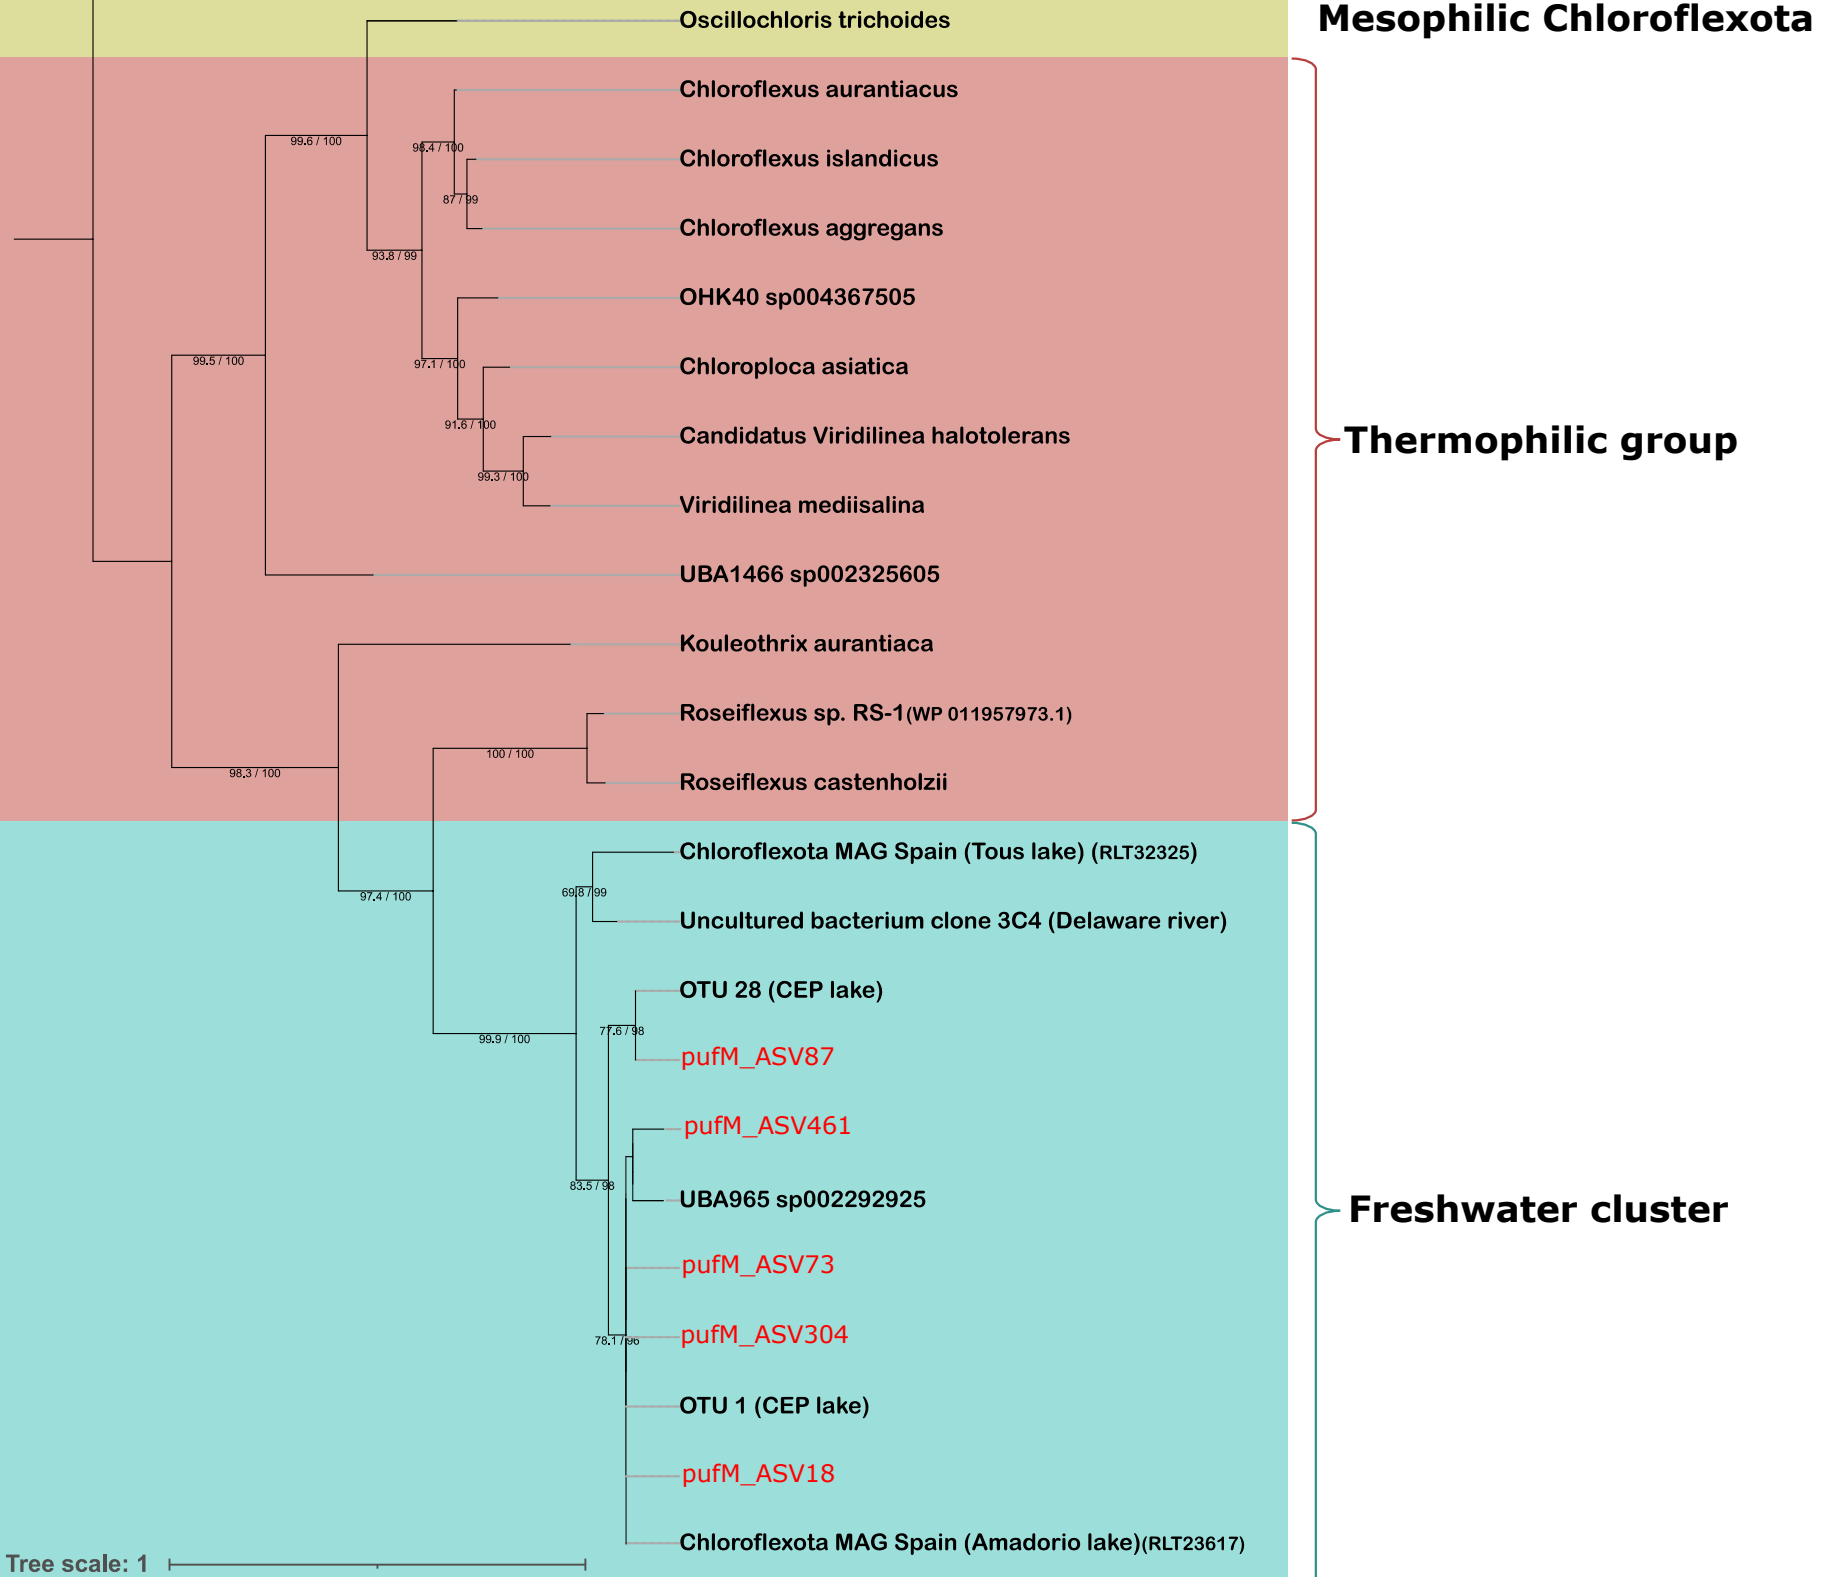

**Supplementary Figure S5.** Details of Chloroflexota sequences distribution in the pufM protein Maximum Likelihood phylogenetic tree computed using LG+F+I+G4 substitution model. The analysis involved pufM amino acid sequences of the reference sequences from Proteobacteria, Chloroflexota, Gemmatimonadota and Eremiobacteriota and the targeted unclassified ASVs.

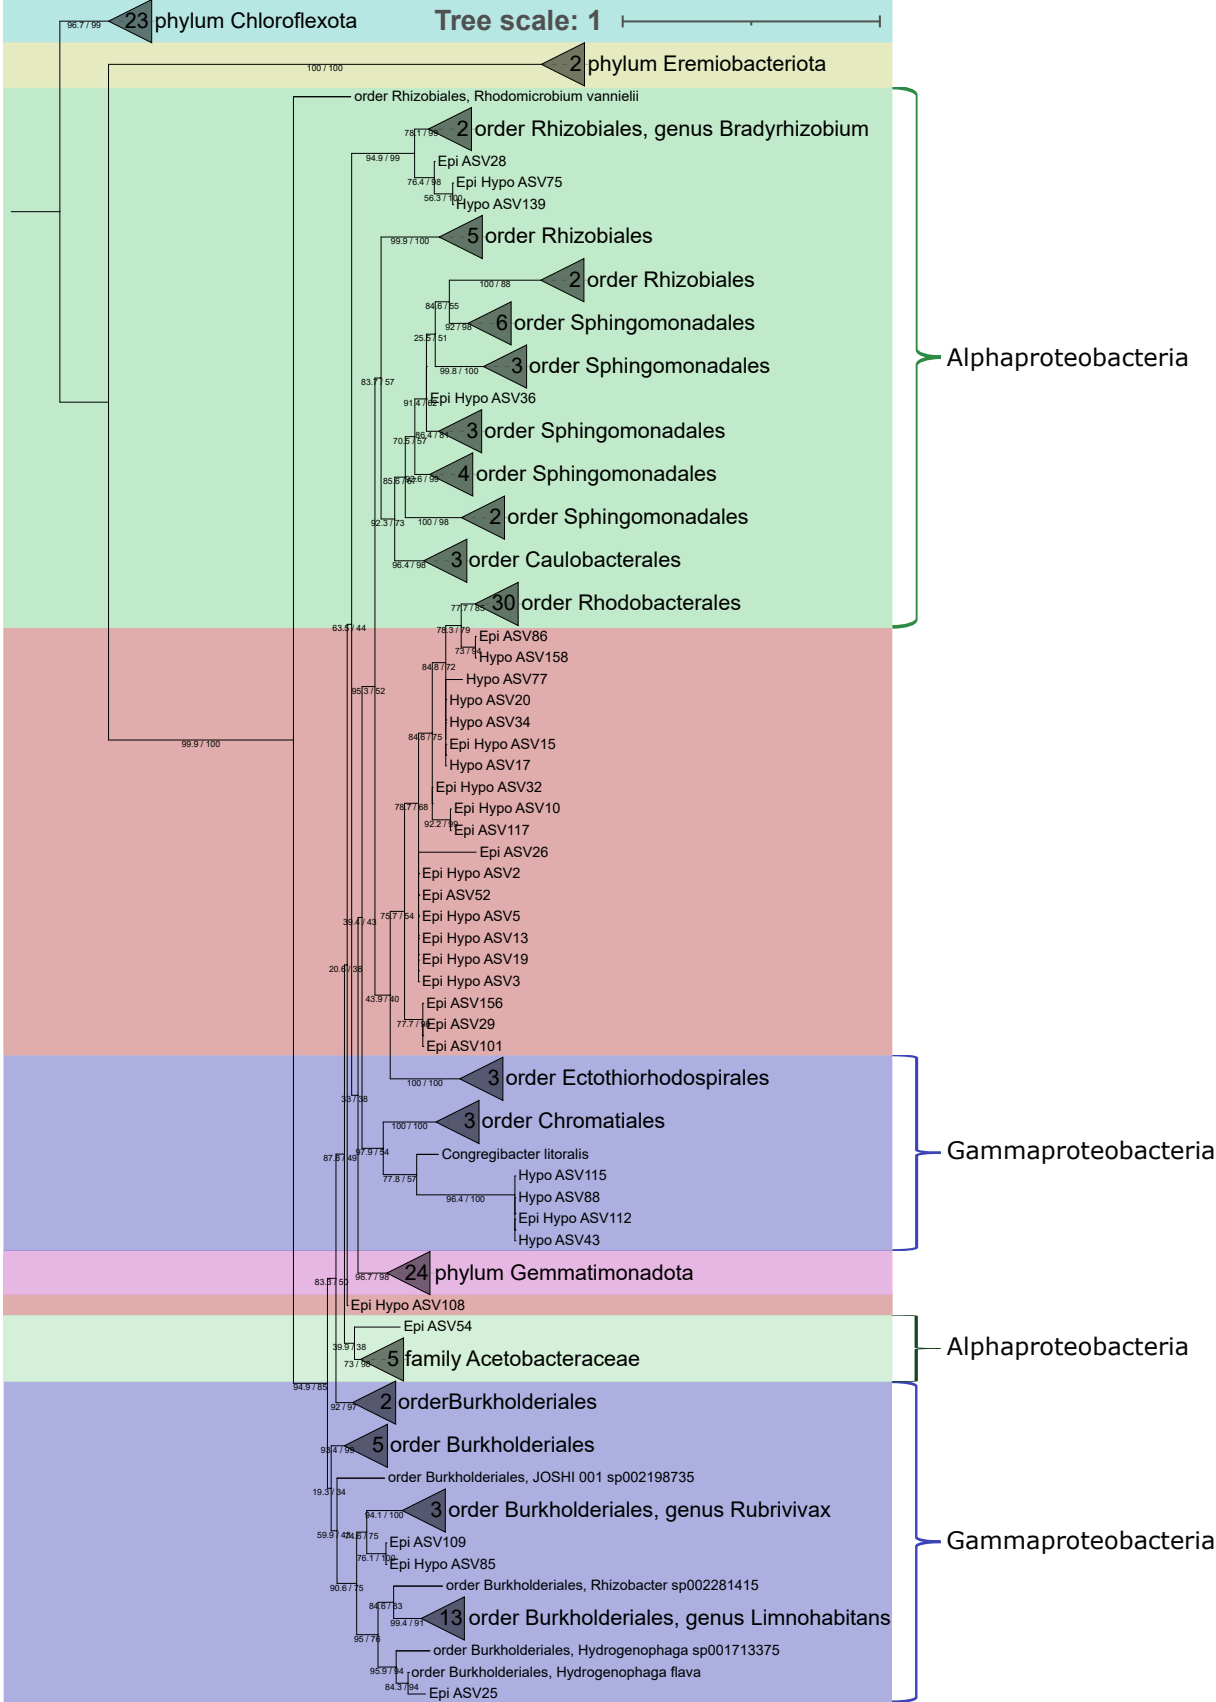

**Supplementary Figure S6.** Phylogenetic tree showing in detail Proteobacteria phylum sequences and unclassified ASVs that clustered inside.
